# Supplementary material
Source: Elsevier journal article supplement (https://www.sciencedirect.com/science/article/pii/S1575181318302079)
Supplement: mmc1 [file S1575181318302079:mmc1.pdf]

## Material adicional

### Anexo 1

|                                                                                                     |                                                                                                            |
|-----------------------------------------------------------------------------------------------------|------------------------------------------------------------------------------------------------------------|
| Cuestionario inicial                                                                                |                                                                                                            |
| 1. ¿Te han enseñado alguna vez primeros auxilios?                                                   | SI/NO                                                                                                      |
| 2. ¿Cómo te parecen tus conocimientos sobre primeros auxilios?                                      | No tengo ninguno/ Algunos/ Suficientes/ Buenos/ Excelentes                                                 |
| 3. ¿Te parece que aprender primeros auxilios es importante?                                         | Totalmente en desacuerdo/ En desacuerdo/ Ni de acuerdo ni en desacuerdo/ De acuerdo/ Totalmente de acuerdo |
| 4. ¿Sabes lo que es una Reanimación Cardiopulmonar (RCP)?                                           | SI/NO                                                                                                      |
| 5. ¿Sabrías realizar una RCP?                                                                       | SI/NO                                                                                                      |
| 6. ¿Cuál de los siguientes es el teléfono de Emergencias?                                           | 012/ 091/ 100/ 112                                                                                         |
| 7. En una RCP en un adulto, ¿cuál es la velocidad de las compresiones por minuto?                   | 50-75/ 75-100/ 100-120/ 125-150                                                                            |
| 8. En una RCP en un adulto, ¿cuál es la profundidad (en cm) a la que se debería comprimir el tórax? | Lo que se pueda/ Entre 20 y 50 mm/ Entre 50 y 60 mm/ Más de 60 mm                                          |
| 9. ¿Sabes lo que es un Desfibrilador Externo Semi-Automático (DESA o DEA)?                          | SI/NO                                                                                                      |
| 10. ¿Sabrías cómo usarlo?                                                                           | SI/NO                                                                                                      |
| 11. ¿Estarías dispuesto a usarlo si fuese necesario?                                                | SI/NO                                                                                                      |
| 12. ¿Consideras que los primeros auxilios deberían incluirse en la formación básica?                | Totalmente en desacuerdo/ En desacuerdo/ Ni de acuerdo ni en desacuerdo/ De acuerdo/ Totalmente de acuerdo |

## Anexo 2

|                                                                |                                   |
|----------------------------------------------------------------|-----------------------------------|
| Lista de comprobación de la prueba práctica con maniquí y DESA |                                   |
| Sexo                                                           | H/M                               |
| Edad                                                           | x años                            |
| Peso                                                           | x kg                              |
| Talla                                                          | x cm                              |
| IMC                                                            | kg.m-2                            |
| ¿Ha realizado el cuestionario?                                 | SI/NO                             |
| ¿Ha visto el video?                                            | SI/NO                             |
| ¿Más de una vez?                                               | 0/1/2                             |
| ¿Por qué medio?                                                | WhatsApp/ Twitter/ Facebook/ Otro |
| ¿Lo ha compartido?                                             | SI/NO                             |
| Valora la escena                                               | SI/NO                             |
| Comprueba respiración                                          | SI/NO                             |
| Abre vía aérea maniobra correcta                               | SI/NO                             |
| Llama al 112                                                   | SI/NO                             |
| Tiempo hasta la primera descarga                               | Segundos                          |
| Errores DESA                                                   | Mal/ Bien                         |
